# Supplementary material for: Trimodal Therapy in Esophageal Squamous Cell Carcinoma: Role of Adjuvant Therapy Following Neoadjuvant Chemoradiation and Surgery
Source: MDPI journal article supplement (doi:10.3390/cancers14153721), 2022-07-30
Supplement: s1 [file s1]

**Table S1.** Treatment protocol of neoadjuvant therapy.

| Neoadjuvant therapy      |                                            | Regimen/technique | Dose                                 | Schedule                 |
|--------------------------|--------------------------------------------|-------------------|--------------------------------------|--------------------------|
| Chemotherapeutic agent 1 |                                            | Paclitaxel        | 175 mg/m <sup>2</sup>                | q3w, 2 cycles            |
|                          |                                            | Carboplatin       | AUC 5                                | q3w, 2 cycles            |
| Chemotherapeutic agent 2 |                                            | Cisplatin         | 75 mg/m <sup>2</sup>                 | q3w, 2 cycles            |
| Radiotherapy             | Intensity-modulated radiotherapy technique |                   | 40-50.4 Gy (1.8-2.0 Gy per fraction) | Concurrent or sequential |

**Table S2.** Treatment protocol of adjuvant therapy.

| Adjuvant therapy          |                                            | Regimen/technique | Dose                                 | Schedule                 |
|---------------------------|--------------------------------------------|-------------------|--------------------------------------|--------------------------|
| Chemotherapeutic agent    |                                            | 5-fluorouracil    | 800 mg/m <sup>2</sup>                | q3w, 2 cycles            |
|                           |                                            | Cisplatin         | 80 mg/m <sup>2</sup>                 | q3w, 2 cycles            |
| Radiotherapy              | Intensity-modulated radiotherapy technique |                   | 40-50.4 Gy (1.8-2.0 Gy per fraction) | Concurrent or sequential |
| Immunotherapeutic agent 1 |                                            | Tislelizumab      | 200mg                                | q3w, 2 cycles            |
| Immunotherapeutic agent 2 |                                            | Sintilimab        | 200mg                                | q3w, 2 cycles            |
| Immunotherapeutic agent 3 |                                            | Pembrolizumab     | 200mg                                | q3w, 2 cycles            |

**Table S3.** Univariate Cox regression model was used to determine variables associated with overall survival and disease-free survival for patients undergoing neoadjuvant therapy and esophagectomy.

| Univariate analyses              | Overall Survival |              |                 | Progression-Free Survival |              |                 |
|----------------------------------|------------------|--------------|-----------------|---------------------------|--------------|-----------------|
|                                  | HR               | 95% CI of HR | <i>p</i> -Value | HR                        | 95% CI of HR | <i>p</i> -Value |
| <b>Gender</b>                    |                  |              |                 |                           |              |                 |
| Male versus female               | 1.736            | 1.020-2.953  | 0.042           | 1.638                     | 1.028-2.609  | 0.038           |
| <b>Age (year)</b>                |                  |              |                 |                           |              |                 |
| > 65 versus ≤ 65                 | 1.119            | 0.911-1.376  | 0.284           | 1.131                     | 0.942-1.357  | 0.187           |
| <b>Smoke</b>                     |                  |              |                 |                           |              |                 |
| Yes versus No                    | 1.712            | 1.153-2.543  | 0.008           | 1.699                     | 1.198-2.410  | 0.003           |
| <b>Alcohol consumption</b>       |                  |              |                 |                           |              |                 |
| Yes versus No                    | 0.978            | 0.602-1.590  | 0.929           | 0.993                     | 0.644-1.532  | 0.975           |
| <b>Preoperative complication</b> |                  |              |                 |                           |              |                 |
| Yes versus No                    | 0.431            | 0.106-1.750  | 0.239           | 0.755                     | 0.308-1.849  | 0.538           |
| <b>Tumor site</b>                |                  |              |                 |                           |              |                 |
| Middle/Lower versus Upper        | 0.956            | 0.545-1.677  | 0.875           | 0.915                     | 0.563-1.486  | 0.719           |
| <b>Tumor length</b>              |                  |              |                 |                           |              |                 |
| > 3cm versus ≤ 3cm               | 2.128            | 1.458-3.106  | 0.000           | 2.034                     | 1.457-2.841  | 0.000           |
| <b>ypTNM</b>                     |                  |              |                 |                           |              |                 |
| III-IV versus I-II               | 3.686            | 2.497-5.441  | 0.000           | 3.098                     | 2.207-4.349  | 0.000           |
| <b>Tumor differentiation</b>     |                  |              |                 |                           |              |                 |
| G3/Gx versus G2/G1               | 0.939            | 0.625-1.412  | 0.763           | 0.886                     | 0.618-1.269  | 0.509           |
| <b>Lymphovascular invasion</b>   |                  |              |                 |                           |              |                 |
| Yes versus No                    | 2.126            | 1.264-3.576  | 0.004           | 2.712                     | 1.741-4.225  | 0.000           |
| <b>Peripheral nerve invasion</b> |                  |              |                 |                           |              |                 |
| Yes versus No                    | 1.665            | 1.070-2.591  | 0.024           | 2.214                     | 1.520-3.226  | 0.000           |
| <b>Tumor regression grade</b>    |                  |              |                 |                           |              |                 |
| TRG 3/2 versus TRG 1/0           | 2.515            | 1.673-3.781  | 0.000           | 2.256                     | 1.585-3.212  | 0.000           |
| <b>Adjuvant Therapy</b>          |                  |              |                 |                           |              |                 |
| Yes versus No                    | 2.076            | 1.429-3.016  | 0.000           | 3.029                     | 2.166-4.237  | 0.000           |

Cox regression model was used to determine variables associated with overall survival and disease-free survival for patients undergoing neoadjuvant therapy and esophagectomy. ypTNM: neoadjuvant treated TNM; TRG: Tumor regression grade
